# Supplementary material for: Inhibition of Cancer Derived Cell Lines Proliferation by Synthesized Hydroxylated Stilbenes and New Ferrocenyl-Stilbene Analogs. Comparison with Resveratrol
Source: Molecules. 2014 Jun 11;19(6):7850–68. doi: 10.3390/molecules19067850 (PMC6271691; doi:10.3390/molecules19067850)
Supplement: Supplementary file 1 [file molecules-19-07850-s001.pdf]

## Supplementary Information

**Figure S1. SM.** Flow cytometry measurements of the effect of stilbene derivatives on the cell cycle phases of SW480 cell line.

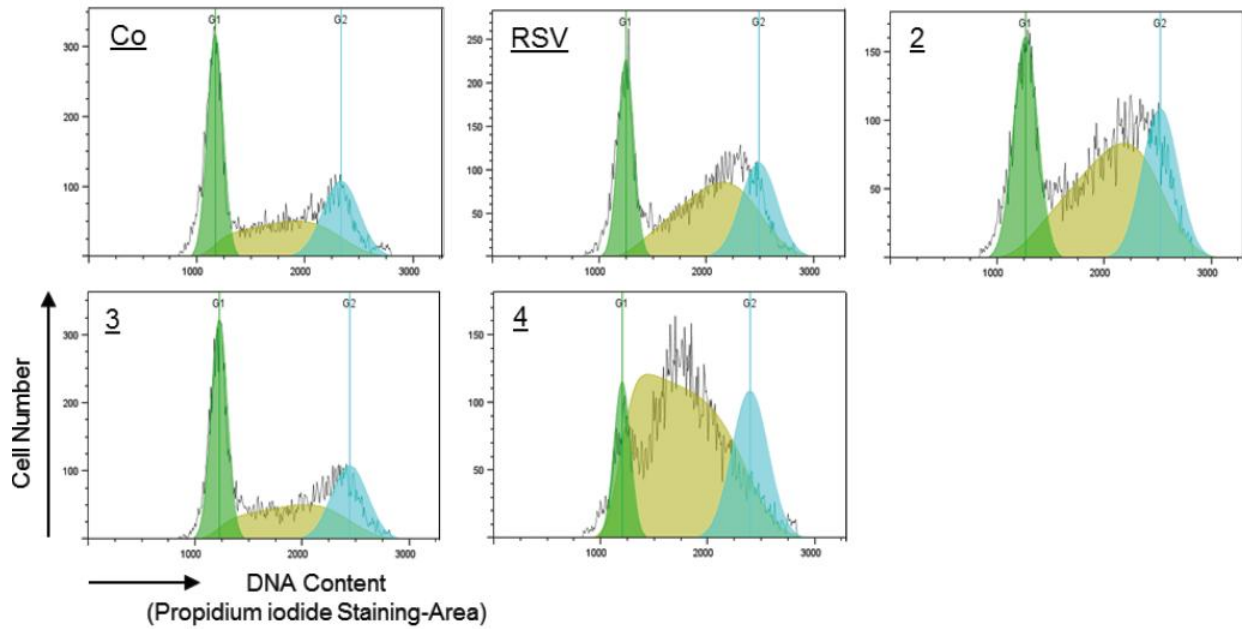

Cells were grown for 48 h in the presence or not (control) of resveratrol (RSV) at 30  $\mu$ M or of stilbene derivatives (30  $\mu$ M). After treatment, nuclear DNA was labeled with propidium iodide, then cell cycle phases were analysed by flow cytometry.
